# Supplementary material for: Video-fluoroscopic swallowing study scale for predicting aspiration pneumonia in Parkinson’s disease
Source: PubMed Central journal article supplement (PMC5991364; doi:10.1371/journal.pone.0197608), 2018-06-06
Supplement: pone.0197608.s001.pdf [file pone.0197608.s001.pdf]

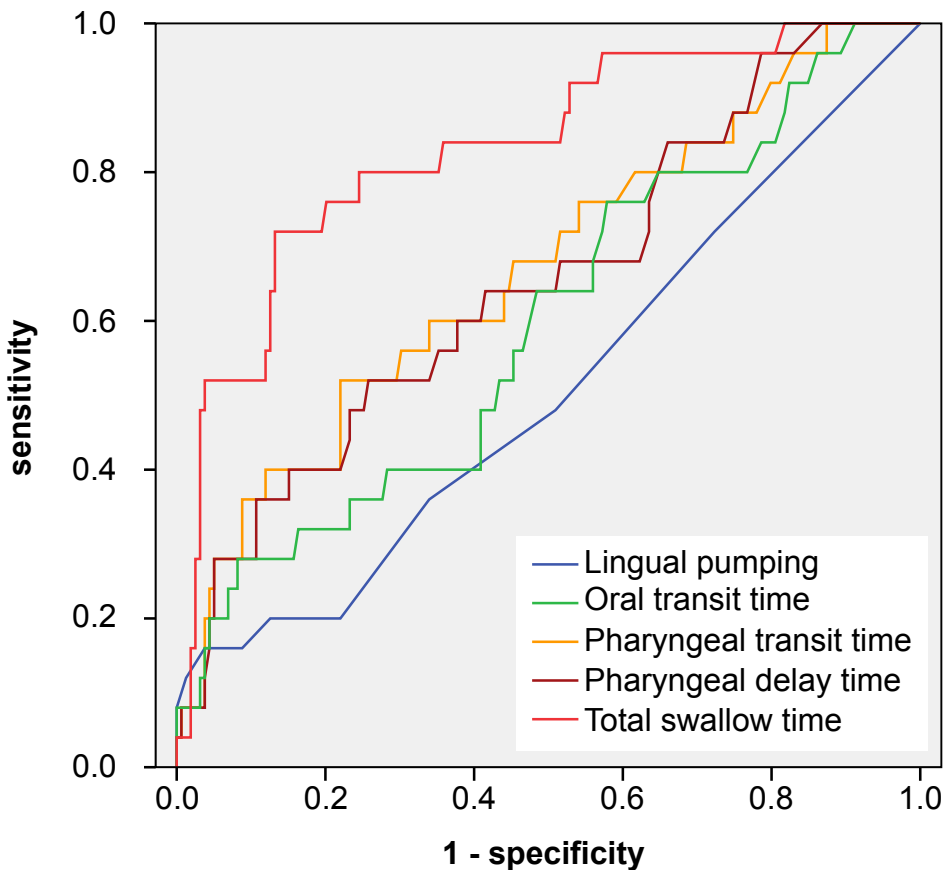

|                         | <b>AUC</b> | <b>Cut-off value</b> | <b>Sensitivity</b> | <b>Specificity</b> |
|-------------------------|------------|----------------------|--------------------|--------------------|
| Lingual pumping         | 0.51       | 3                    | 0.36               | 0.66               |
| Oral transit time       | 0.60       | 5.0                  | 0.28               | 0.91               |
| Pharyngeal transit time | 0.67       | 5.0                  | 0.36               | 0.91               |
| Pharyngeal delay time   | 0.65       | 4.0                  | 0.36               | 0.89               |
| Total swallow time      | 0.83       | 10.0                 | 0.72               | 0.85               |
