# Supplementary material for: Video-fluoroscopic swallowing study scale for predicting aspiration pneumonia in Parkinson’s disease
Source: PubMed Central journal article supplement (PMC5991364; doi:10.1371/journal.pone.0197608), 2018-06-06

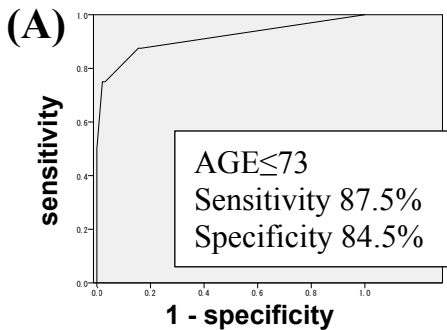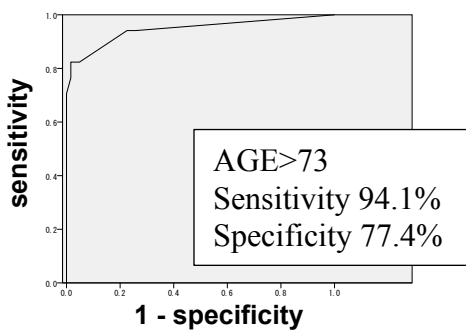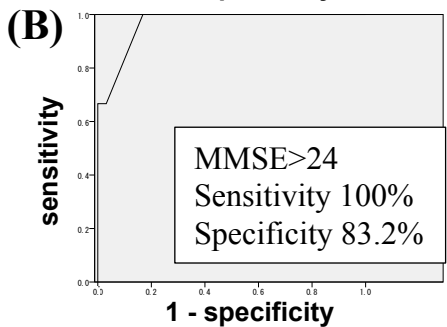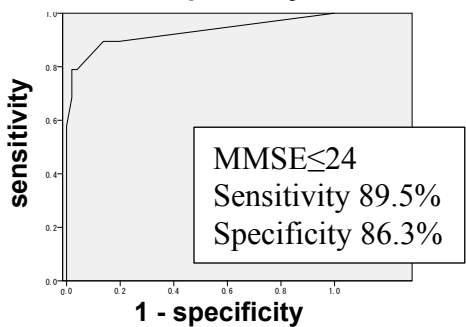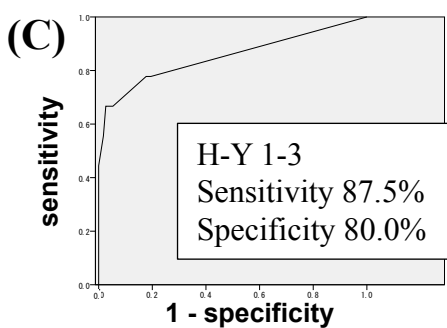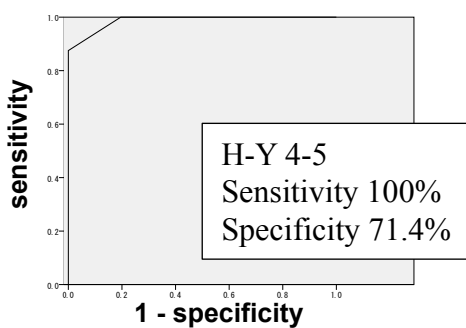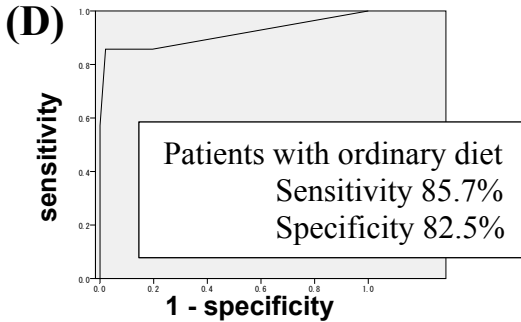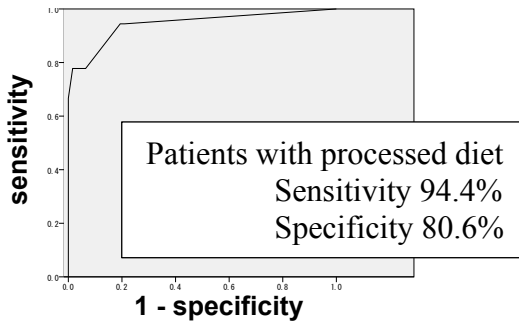

Supplement: pone.0197608.s002.pdf [file pone.0197608.s002.pdf]
